# Supplementary material for: Anab initiobased full-dimensional potential energy surface for OH + O2⇄ HO3and low-lying vibrational levels of HO3
Source: Royal Society of Chemistry journal article supplement (doi:10.1039/c9cp02206f), 2019-01-01
Supplement: c9cp02206f2.pdf [file c9cp02206f2.pdf]

Supporting information

for

**An ab initio based full-dimensional potential energy surface for  $\text{OH} + \text{O}_2 \rightleftharpoons \text{HO}_3$   
and low-lying vibrational levels of  $\text{HO}_3$**

Xixi Hu,<sup>1,2,\*</sup> Junxiang Zuo,<sup>1</sup> Changjian Xie,<sup>2</sup> Richard Dawes,<sup>3,\*</sup> Hua Guo,<sup>2</sup> and

Daiqian Xie<sup>1</sup>

<sup>1</sup>*Institute of Theoretical and Computational Chemistry, Key Laboratory of Mesoscopic*

*Chemistry, School of Chemistry and Chemical Engineering, Nanjing University,*

*Nanjing 210093, China*

<sup>2</sup>*Department of Chemistry and Chemical Biology, University of New Mexico,*

*Albuquerque, New Mexico 87131, USA*

<sup>3</sup>*Department of Chemistry, Missouri University of Science and Technology, Rolla,*

*Missouri 65409, USA*

Corresponding authors: [xxhu@nju.edu.cn](mailto:xxhu@nju.edu.cn), [dawesr@mst.edu](mailto:dawesr@mst.edu)

Table S-I. Geometries and energies of *trans*-HO<sub>3</sub>, *cis*-HO<sub>3</sub> and i-TS calculated from the PESs based on both M06 and MRCI-F12 method with a comparison with MRCI+Q/CBS results and experimental results.

| Parameter                  | <i>trans</i> -HO <sub>3</sub> |                |            |                    | <i>cis</i> -HO <sub>3</sub> |                |            | i-TS        |                |
|----------------------------|-------------------------------|----------------|------------|--------------------|-----------------------------|----------------|------------|-------------|----------------|
|                            | PES (M06-L)                   | PES (MRCI-F12) | MRCI+Q/CBS | Expt. <sup>1</sup> | PES (M06-L)                 | PES (MRCI-F12) | MRCI+Q/CBS | PES (M06-L) | PES (MRCI-F12) |
| $R_{O''H}/\text{\AA}$      | 0.968                         | 0.971          | 0.977      | 0.972              | 0.971                       | 0.975          | 0.980      | 0.967       | 0.971          |
| $R_{O'O''}/\text{\AA}$     | 1.625                         | 1.658          | 1.700      | 1.688              | 1.568                       | 1.573          | 1.607      | 1.648       | 1.667          |
| $R_{OO'}/\text{\AA}$       | 1.216                         | 1.224          | 1.221      | 1.225              | 1.233                       | 1.244          | 1.242      | 1.219       | 1.228          |
| $\theta_{O'O''H}/^\circ$   | 96.55                         | 96.33          | 94.88      | 90.0               | 98.45                       | 96.76          | 95.36      | 97.09       | 97.09          |
| $\theta_{OO'O''}/^\circ$   | 110.96                        | 110.04         | 110.35     | 111.0              | 113.46                      | 111.97         | 111.94     | 112.60      | 112.34         |
| $\varphi_{OO'O''H}/^\circ$ | 180                           | 180            | 180        | 180                | 0                           | 0              | 0          | 75.65       | 81.40          |
| $\Delta E/\text{cm}^{-1}$  | 0                             | 0              | 0          | 0                  | 202.85                      | 32.98          | 26.93      | 654.03      | 365.22         |

Table S-II. Comparison of calculated harmonic frequencies (in  $\text{cm}^{-1}$ ) of the stationary points for  $\text{HO}_3$  with other *ab initio* results for  $\text{HO}_3$ .<sup>2</sup>

| <i>trans</i>                |                       |                | <i>cis</i>                  |                       |                | i-TS                        |                       |                |
|-----------------------------|-----------------------|----------------|-----------------------------|-----------------------|----------------|-----------------------------|-----------------------|----------------|
| MRCI+Q/<br>VTZ <sup>2</sup> | PES<br>(MRCI-<br>F12) | PES<br>(M06-L) | MRCI+Q<br>/VTZ <sup>2</sup> | PES<br>(MRCI-<br>F12) | PES<br>(M06-L) | MRCI+Q/<br>VTZ <sup>2</sup> | PES<br>(MRCI-<br>F12) | PES<br>(M06-L) |
| 147.6                       | 160.9                 | 200.3          | 238.5                       | 221.7                 | 256.5          | 160.2i                      | 158.2i                | 212.3i         |
| 222.0                       | 300.4                 | 338.7          | 282.2                       | 314.1                 | 352.2          | 167.5                       | 254.3                 | 270.3          |
| 501.4                       | 507.0                 | 584.2          | 595.7                       | 612.3                 | 654.8          | 503.1                       | 541.2                 | 574.6          |
| 1094.3                      | 1114.4                | 1165.9         | 1221.6                      | 1244.5                | 1247.8         | 1052.2                      | 1107.5                | 1107.4         |
| 1421.4                      | 1429.7                | 1461.4         | 1356.0                      | 1385.4                | 1420.8         | 1391.8                      | 1390.3                | 1427.1         |
| 3761.9                      | 3780.0                | 3799.0         | 3721.7                      | 3717.7                | 3729.7         | 3758.1                      | 3768.6                | 3794.8         |

Table S-III. Calculated vibrational levels (in  $\text{cm}^{-1}$ ) of  $\text{HO}_3$  and their assignment in terms of the six normal mode quantum numbers ( $n_1n_2n_3n_4n_5n_6$ ).

| par. | $E_{\text{abs}}$ | $E\text{-ZPE}_{\text{trans}}$ | $E\text{-ZPE}_{\text{cis}}$ | <i>trans</i> | <i>cis</i> |
|------|------------------|-------------------------------|-----------------------------|--------------|------------|
| +1   | 3582.463         | 0.000                         |                             | (000000)     |            |
| +1   | 3582.467         | 0.004                         |                             | (000000)     |            |
| +1   | 3693.809         |                               | 0.000                       |              | (000000)   |
| +1   | 3693.827         |                               | 0.017                       |              | (000000)   |
| -1   | 3709.394         | 126.931                       |                             | (000001)     |            |
| -1   | 3709.398         | 126.934                       |                             | (000001)     |            |
| +1   | 3806.817         | 224.354                       |                             | (000002)     |            |
| +1   | 3806.819         | 224.355                       |                             | (000002)     |            |
| -1   | 3823.173         |                               | 129.363                     |              | (000001)   |
| -1   | 3823.183         |                               | 129.373                     |              | (000001)   |
| +1   | 3844.434         | 261.970                       |                             | (000010)     |            |
| +1   | 3844.438         | 261.974                       |                             | (000010)     |            |
| +1   | 3901.562         |                               | 207.752                     |              | (000002)   |
| -1   | 3901.563         | 319.099                       |                             | (000003)     |            |
| +1   | 3901.569         |                               | 207.760                     |              | (000002)   |
| -1   | 3901.570         | 319.106                       |                             | (000003)     |            |
| -1   | 3956.749         | 374.285                       |                             | (000011)     |            |
| -1   | 3956.753         | 374.290                       |                             | (000011)     |            |
| +1   | 3958.218         |                               | 264.409                     |              | (000010)   |
| +1   | 3958.227         |                               | 264.417                     |              | (000010)   |
| +1   | 4020.228         | 437.765                       | 326.419                     |              |            |
| +1   | 4020.231         | 437.768                       | 326.422                     |              |            |
| -1   | 4024.997         | 442.534                       | 331.188                     |              |            |
| -1   | 4025.003         | 442.539                       | 331.193                     |              |            |
| +1   | 4053.862         | 471.399                       |                             | (000012)     |            |
| +1   | 4053.866         | 471.403                       |                             | (000012)     |            |
| +1   | 4065.401         | 482.937                       |                             | (000100)     |            |
| +1   | 4065.425         | 482.961                       |                             | (000100)     |            |
| +1   | 4071.952         | 489.488                       |                             | (000020)     |            |
| +1   | 4071.958         | 489.495                       |                             | (000020)     |            |
| -1   | 4078.436         |                               | 384.626                     |              | (000011)   |
| -1   | 4078.441         |                               | 384.632                     |              | (000011)   |
| +1   | 4113.917         | 531.454                       | 420.108                     |              |            |
| +1   | 4113.927         | 531.464                       | 420.118                     |              |            |
| -1   | 4114.613         | 532.149                       | 420.803                     |              |            |
| -1   | 4114.617         | 532.154                       | 420.808                     |              |            |
| +1   | 4122.169         | 539.705                       | 428.359                     |              |            |
| +1   | 4122.223         | 539.759                       | 428.413                     |              |            |
| -1   | 4144.094         | 561.631                       | 450.285                     |              |            |
| -1   | 4144.122         | 561.658                       | 450.312                     |              |            |

|     |           |          |          |          |          |
|-----|-----------|----------|----------|----------|----------|
| +1  | 4151.912  | 569.448  | 458.102  |          |          |
| +1  | 4152.217  | 569.753  | 458.407  |          |          |
| -1  | 4158.313  | 575.850  | 464.504  |          |          |
| -1  | 4158.409  | 575.945  | 464.599  |          |          |
| +1  | 4173.799  | 591.335  | 479.990  |          |          |
| +1  | 4173.802  | 591.339  | 479.993  |          |          |
| +1  | 4177.434  | 594.971  | 483.625  |          |          |
| +1  | 4177.443  | 594.980  | 483.634  |          |          |
| +1  | 4182.305  |          | 488.495  |          | (000020) |
| +1  | 4182.332  |          | 488.523  |          | (000020) |
| -1  | 4186.527  | 604.063  | 492.717  |          |          |
| -1  | 4186.914  | 604.451  | 493.105  |          |          |
| +1  | 4188.287  | 605.823  | 494.477  |          |          |
| +1  | 4189.275  | 606.811  | 495.465  |          |          |
| +1  | 4193.677  | 611.213  | 499.867  |          |          |
| +1  | 4195.052  | 612.589  | 501.243  |          |          |
| -1  | 4195.556  | 613.093  | 501.747  |          |          |
| -1  | 4195.570  | 613.107  | 501.761  |          |          |
| +1  | 4196.743  | 614.280  | 502.934  |          |          |
| +1  | 4209.492  | 627.029  | 515.683  |          |          |
| +1  | 4209.929  | 627.465  | 516.119  |          |          |
| -1  | 4210.154  | 627.691  | 516.345  |          |          |
| -1  | 4210.242  | 627.778  | 516.432  |          |          |
| +1  | 4215.554  | 633.091  | 521.745  |          |          |
| +1  | 4215.622  | 633.159  | 521.813  |          |          |
| +1  | 4224.958  | 642.495  | 531.149  |          |          |
| +1  | 4226.308  | 643.845  | 532.499  |          |          |
| +1  | 4226.478  | 644.015  | 532.669  |          |          |
| +1  | 4229.150  | 646.687  | 535.341  |          |          |
| +1  | 4231.064  | 648.601  | 537.255  |          |          |
| +1  | 4239.206  |          | 545.397  |          | (000100) |
| +1  | 4239.286  |          | 545.476  |          | (000100) |
| ... | ...       |          |          |          |          |
| +1  | 4625.742  | 1043.279 |          | (001000) |          |
| +1  | 4858.066  |          | 1164.257 |          | (001000) |
| +1  | 4966.914  | 1384.451 |          | (010000) |          |
| +1  | 5002.035  |          | 1308.226 |          | (010000) |
| +1  | 7184.929  | 3602.466 |          | (100000) |          |
| +1  | 7252.715  |          | 3558.906 |          | (100000) |
| -1  | 7309.340  | 3726.876 |          | (100001) |          |
| +1  | 7795.690  |          | 4101.881 |          | (100100) |
| +1  | 8197.352  | 4614.889 |          | (101000) |          |
| +1  | 10643.622 | 7061.158 |          | (200000) |          |

Table S-IV. Calculated vibrational levels (in  $\text{cm}^{-1}$ ) of  $\text{DO}_3$  and their assignment in terms of the six normal mode quantum numbers ( $n_1n_2n_3n_4n_5n_6$ ).

| par. | $E_{\text{abs}}$ | $E\text{-ZPE}_{\text{trans}}$ | $E\text{-ZPE}_{\text{cis}}$ | <i>trans</i> | <i>cis</i> |
|------|------------------|-------------------------------|-----------------------------|--------------|------------|
| +1   | 2926.125         | 0.000                         |                             | (000000)     |            |
| +1   | 2926.129         | 0.004                         |                             | (000000)     |            |
| +1   | 3025.368         | 99.243                        | 0.000                       |              | (000000)   |
| +1   | 3025.385         | 99.260                        | 0.017                       |              | (000000)   |
| -1   | 3026.585         | 100.460                       |                             | (000001)     |            |
| -1   | 3026.588         | 100.463                       |                             | (000001)     |            |
| +1   | 3113.395         | 187.270                       |                             | (000002)     |            |
| +1   | 3113.397         | 187.273                       |                             | (000002)     |            |
| -1   | 3141.447         |                               | 116.078                     |              | (000001)   |
| -1   | 3141.454         |                               | 116.086                     |              | (000001)   |
| -1   | 3184.540         | 258.415                       |                             | (000003)     |            |
| -1   | 3184.546         | 258.421                       |                             | (000003)     |            |
| +1   | 3193.269         | 267.144                       |                             | (000010)     |            |
| +1   | 3193.276         | 267.151                       |                             | (000010)     |            |
| +1   | 3204.816         |                               | 179.448                     |              | (000002)   |
| +1   | 3204.824         |                               | 179.456                     |              | (000002)   |
| +1   | 3260.731         | 334.606                       | 235.363                     |              |            |
| +1   | 3260.742         | 334.617                       | 235.374                     |              |            |
| -1   | 3269.744         |                               | 244.375                     |              | (000003)   |
| -1   | 3269.750         |                               | 244.382                     |              | (000003)   |
| -1   | 3284.267         | 358.142                       |                             | (000011)     |            |
| -1   | 3284.273         | 358.148                       |                             | (000011)     |            |
| +1   | 3297.806         |                               | 272.437                     |              | (000010)   |
| +1   | 3297.830         |                               | 272.462                     |              | (000010)   |
| +1   | 3357.510         | 431.385                       |                             | (000012)     |            |
| +1   | 3357.514         | 431.389                       |                             | (000012)     |            |
| -1   | 3362.346         | 436.221                       | 336.977                     |              |            |
| -1   | 3362.357         | 436.232                       | 336.989                     |              |            |
| +1   | 3369.532         | 443.407                       | 344.164                     |              |            |
| +1   | 3369.540         | 443.415                       | 344.172                     |              |            |
| +1   | 3390.343         | 464.218                       |                             | (000100)     |            |
| +1   | 3390.363         | 464.239                       |                             | (000100)     |            |
| -1   | 3394.741         |                               | 369.373                     |              | (000011)   |
| -1   | 3394.748         |                               | 369.380                     |              | (000011)   |
| +1   | 3424.896         | 498.771                       |                             | (000020)     |            |
| +1   | 3424.904         | 498.779                       |                             | (000020)     |            |
| -1   | 3427.314         | 501.189                       |                             | (000013)     |            |
| -1   | 3427.323         | 501.198                       |                             | (000013)     |            |
| +1   | 3440.248         | 514.123                       | 414.880                     |              |            |
| +1   | 3440.260         | 514.135                       | 414.892                     |              |            |

|     |          |          |          |          |          |
|-----|----------|----------|----------|----------|----------|
| +1  | 3475.104 |          | 449.736  |          | (000012) |
| +1  | 3475.120 |          | 449.751  |          | (000012) |
| -1  | 3477.612 | 551.487  | 452.244  |          |          |
| -1  | 3477.623 | 551.498  | 452.255  |          |          |
| -1  | 3496.409 | 570.284  |          | (000101) |          |
| -1  | 3496.420 | 570.295  |          | (000101) |          |
| -1  | 3502.184 | 576.059  |          | (000021) |          |
| -1  | 3502.193 | 576.068  |          | (000021) |          |
| +1  | 3517.614 |          | 492.245  |          | (000020) |
| +1  | 3517.650 |          | 492.282  |          | (000020) |
| -1  | 3528.140 | 602.015  | 502.772  |          |          |
| -1  | 3528.144 | 602.019  | 502.776  |          |          |
| +1  | 3535.324 | 609.199  | 509.956  |          |          |
| +1  | 3535.360 | 609.235  | 509.992  |          |          |
| +1  | 3550.398 | 624.273  |          | (000022) |          |
| +1  | 3550.448 | 624.323  |          | (000022) |          |
| +1  | 3559.102 |          | 533.734  |          | (000100) |
| +1  | 3559.281 |          | 533.913  |          | (000100) |
| +1  | 3571.296 | 645.171  | 545.928  |          |          |
| +1  | 3571.301 | 645.177  | 545.933  |          |          |
| -1  | 3574.293 | 648.168  | 548.925  | (000023) |          |
| -1  | 3574.299 | 648.174  | 548.931  | (000023) |          |
| +1  | 3583.230 | 657.105  | 557.862  |          |          |
| +1  | 3583.241 | 657.116  | 557.873  |          |          |
| -1  | 3583.562 | 657.437  | 558.193  |          |          |
| -1  | 3583.578 | 657.453  | 558.210  |          |          |
| +1  | 3592.618 | 666.493  |          | (000102) |          |
| +1  | 3592.629 | 666.504  |          | (000102) |          |
| +1  | 3597.932 | 671.807  | 572.564  |          |          |
| +1  | 3597.952 | 671.827  | 572.583  |          |          |
| -1  | 3599.190 | 673.065  | 573.822  |          |          |
| -1  | 3599.194 | 673.070  | 573.826  |          |          |
| ... | ...      |          |          |          |          |
| +1  | 3737.112 | 810.987  |          | (001000) |          |
| +1  | 3937.176 |          | 911.808  |          | (001000) |
| +1  | 4304.521 | 1378.396 |          | (010000) |          |
| +1  | 4338.032 |          | 1312.663 |          | (010000) |
| +1  | 5582.904 | 2656.779 |          | (100000) |          |
| +1  | 5650.290 |          | 2624.922 |          | (100000) |
| -1  | 5682.513 | 2756.388 |          | (100001) |          |
| +1  | 6379.978 | 3453.853 |          | (101000) |          |
| +1  | 8161.448 | 5235.323 |          | (200000) |          |

### References:

1. K. Suma, Y. Sumiyoshi and Y. Endo, *Science*, 2005, **308**, 1885.
2. A. J. C. Varandas, *Phys. Chem. Chem. Phys.*, 2011, **13**, 9796.
